# Supplementary material for: Real‐time observation of flexible domain movements in CRISPR–Cas9
Source: PubMed Central journal article supplement — EMBO J. 2018 Apr 12;37(10):e96941. doi: 10.15252/embj.201796941 (PMC5978321; doi:10.15252/embj.201796941), 2018-04-12
Supplement: EMBJ-37-e96941-s001.pdf [file EMBJ-37-e96941-s001.pdf]

# **Appendix**

## **Real-time Observation of Flexible Domain Movements in Cas9**

**Saki Osuka, Kazushi Isomura, Shohei Kajimoto, Tomotaka Komori, Hiroshi Nishimasu, Tomohiro Shima, Osamu Nureki, and Sotaro Uemura**

### **Contents:**

**Appendix Figure S1** - Fluorescence anisotropy and lifetime of dyes on Cas9 constructs.

**Appendix Figure S2** - Dwell time histograms of the HNH domain in three positions during flexible movements.

**Appendix Figure S3** - DNA sequence used in this study.

---

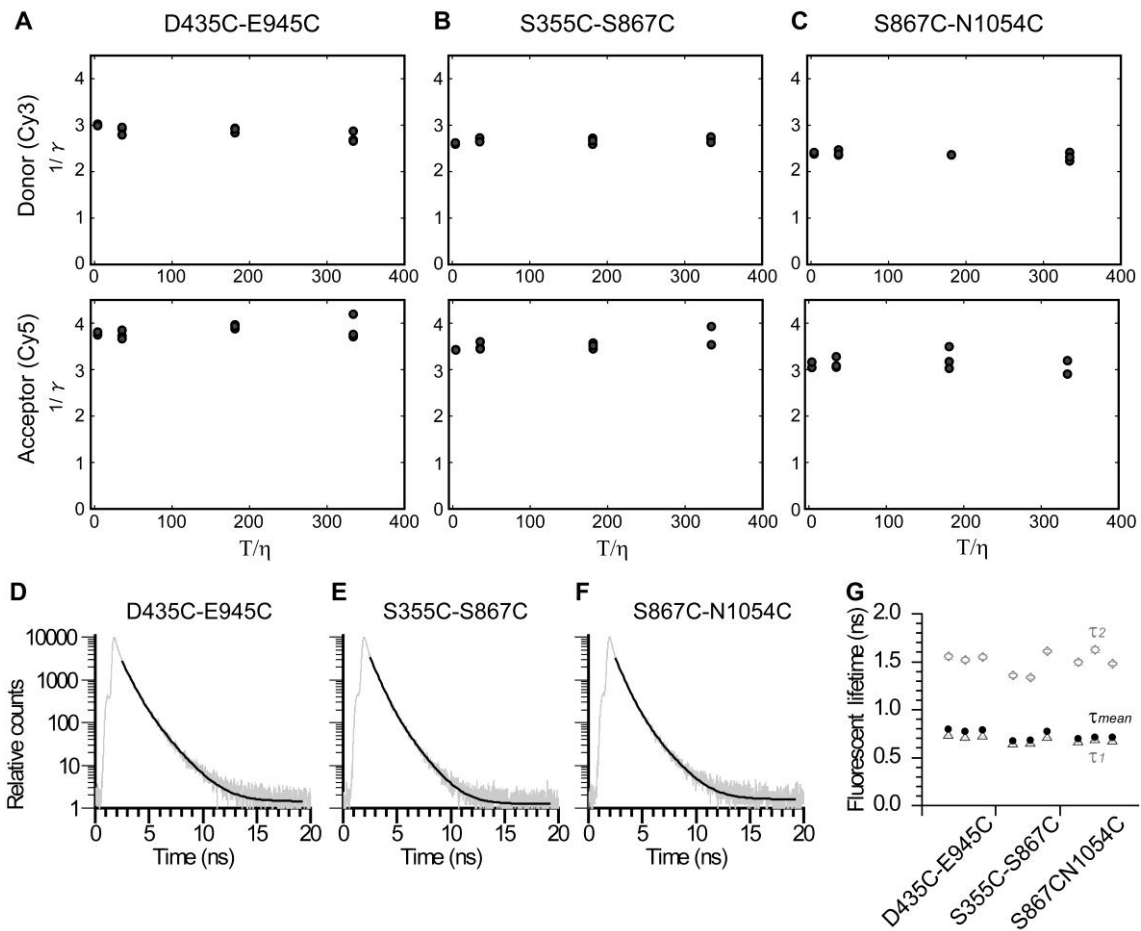

**Appendix Figure S1 - Fluorescence anisotropy and lifetime of dyes on Cas9 constructs.**

A-C Plots of the inverse fluorescence anisotropies ( $\gamma$ ) of Cy3 and Cy5 on Cas9 constructs against  $T/\eta$ . Here, absolute temperature ( $T$ ) = 298 K, and the viscosities of the sample ( $\eta$ ) corresponding to 0, 0.001, 0.01 and 0.1% methyl cellulose solutions were 0.89, 1.64, 8.39 and 75.89, respectively. The plots are summaries of three individual experiments for each construct (A: D435C-E945C, B: S355C-S867C, C: S867C-N1054C). The y-intercepts were calculated by extrapolating the plots to a linear function, yielding the estimated anisotropy values. The values for Cy3 anisotropy (upper panels) were  $0.34 \pm 0.006$  in D435C-E945C,  $0.38 \pm 0.004$  in S355C-S867C and  $0.41 \pm 0.004$  in S867C-N1054C (mean  $\pm$  SEM,  $n = 3$ ), and the

values for Cy5 (lower panels) were  $\gamma = 0.27 \pm 0.005$  in D435C-E945C,  $0.29 \pm 0.006$  in S355C-S867C and  $0.32 \pm 0.009$  in S867C-N1054C (mean  $\pm$  SEM, n = 3).

In the case of low anisotropy, the orientation factor,  $\kappa^2$ , is close to the dynamic isotropic limit of  $\kappa^2 = 2/3$ . Otherwise,  $\kappa^2$  is widely distributed in the range of  $0 \leq \kappa^2 \leq 4$ . Thus, the high anisotropies of Cy3 and Cy5 obtained, which are close to the theoretical maximum value of 0.4, obscured the value of  $\kappa^2$  so that we were unable to estimate accurate distances between the two fluorochromes on Cas9 molecules from the FRET efficiency.

D-F Representative time traces of the fluorescence lifetime of Cy3 on Cas9 constructs (D: D435C-E945C, E: S355C-S867C, F: S867C-N1054C). The time trace data (gray) were fitted to double-exponential decay curves (black) to calculate the fluorescence lifetimes.

G Summary of Cy3 lifetimes calculated from three individual experiments for each construct. The grey triangles and diamonds represent the fast ( $\tau_1$ ) and slow ( $\tau_2$ ) components of the lifetime. The mean lifetimes ( $\tau_{mean}$ , black circle) were  $0.78 \pm 0.01$  for D435C-E945C,  $0.71 \pm 0.05$  for S355C-S867C and  $0.71 \pm 0.01$  for S867C-N1054C (mean  $\pm$  SEM, n = 3). Bars are SEM. The lifetimes obtained were shorter than normal dye tumbling time (1-10 ns). Therefore, the high anisotropy of the dye on Cas9 constructs (A-C) is most likely due to the short fluorescence lifetimes (D-G).

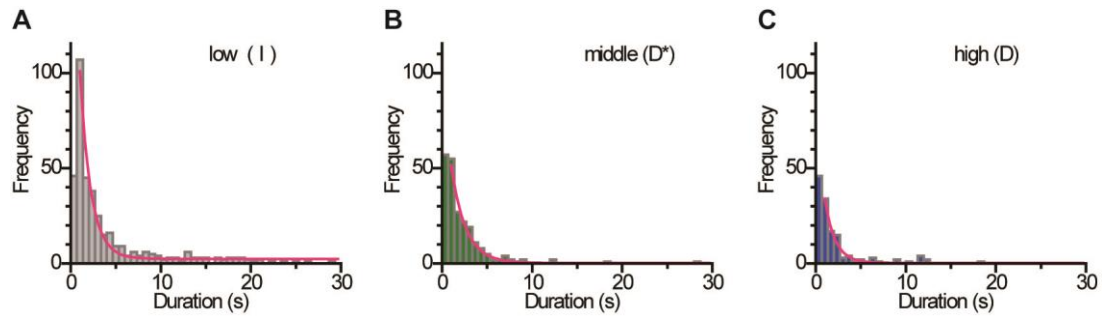

**Appendix Figure S2 - Dwell time histograms of the HNH domain in three positions during flexible movements.**

A-C Dwell time distributions of the HNH domain in the I (A), D\* (B) and D (C) positions in fluctuating S355C-S867C molecules. Assays were performed in the presence of  $Mg^{2+}$ , sgRNA and target DNA. By fitting the distributions to a single exponential decay function (red curves), the mean dwell times were determined as  $1.22 \pm 0.07$  s for the I position ( $n = 399$ ),  $1.61 \pm 0.08$  s for the D\* position ( $n = 219$ ) and  $1.14 \pm 0.08$  s for the D position ( $n = 124$ ). Data are shown as the mean  $\pm$  SEM.

*EcoRI*  
gaattc actggcgcgtgttttacaacgtcgtgactgggaaaaccctggcggttacccaacttaatgccttgcagcacatccccctttcgccagctggcgt 100  
aatagcgaagagggccgcaccgatcgcccttcccaacagttgcccagcctgaatggcggaatggcgctgatgcggtattttctcttacgcatctgtgcg 200  
gtatttcacaccgcataatggtgcaactctcagtaacaatctgctctgatgcccgcatagttaagccagccccgcacccgcgaacacccgctgacgcgcctg 300  
acgggcttctgtctccccgcatccgcttacagacaagctgtgaccgtctccgggagctgcatgtgtcagagggttttcaccgctcatcaccgaaacgcgcg 400  
agacgaaagggcctcgtgatacgccctatttttataggttaatgtcatgataataatgggtttcttagacgtcaggtggcacttttcggggaaatgtgcgcg 500  
gaaccctatattgtttatttttctaaatacggaaattaggtgcgcttggcattcaaatatgtatccgctcatgagacaataaccctgataaatgctt 600

Target sequence PAM

caataatattgaaaaggaagagtatgagattcaacatttcctgtgcgccttattccctttttgcggcattttgccttctgtttttgctcaccag 700  
aaacgctggtgaaagttaaagatgctgaagatcagttgggtgcacgagtggttacatcgaaactggatctcaacagcggtaagatccttgagagttttcg 800  
ccccgaagaacggttttccaatgatgagcacttttaaagtctctgctatgtggcgcggtattatcccgatattgacgcccgggcaagagcaactcggtcgccgc 900  
atacactattctcagaatgacttggttgagtactcaccagtcacagaaaagcatcttacggatggcatgacagtaagagaattatgcagtgctgccataa 1000  
ccatgagtgataaacactgcggccaacttacttctgacaacgatcggaggaccgaaggagctaacgcctttttgcacaacatgggggatcatgtaactcg 1100  
ccttgatcgttgggaacgggagctgaatgaagccataccaaaacgacgagcgtgacaccacgatgcctgtagcaatggcaacaacgttgcgcaaaactatta 1200  
actggcgaactacttactctagcttcccgccaacaattaatagactggatggaggcggataaagtgcaggaccacttctgcgctcgcccttccgcttgc 1300  
gctggtttattgctgataaatctggagccggtgagcgtgggtctcgcggtatcattgcagcactggggccagatggtaagccctcccgatcgtagttat 1400  
ctacacgacggggagtcaggcaactatggatgaacgaaatagacagatcgctgagatagggtgcctcactgattagcatggtaactgtcagaccaagtt 1500  
tactcatatatacttttagattgattttaaacttcattttaatttaaaggatctaggtgaagatcctttttgataatctcatgaccaaaatcccttaac 1600  
gtgagttttcgttccactgagcgtcagaccctcgtagaaaagatcaaaaggatcttcttgagatccttttttctgcgcgtaactctgctgcttgcaaaacaa 1700  
aaaaccacgcgtaccagcgggtggtttgtttccgcatcaagagctaccaactcttttccgaaggttaactggcttcagcagagcgcagataccaataact 1800  
gttcttctagtgtagccgtagtttaggccaccacttcaagaactctgtagcaccgcctacatacctcgtctgctaatcctgttaccagtggtcgtgccca 1900  
gtggcgataaagtcgtgtcttaccgggttggaactcaagacgatagttaccggataaggcgacgcggtcgggctgaacggggggttcgtgcacacagcccag 2000  
cttggagcgaacgacctacccgaactgagatacctacagcgtgagctatgagaaagcgcacgcttcccgaaggagaaaggcggacaggtatccggta 2100  
agcggcagggctcggaacaggagagcgcacgaggagcttccagggggaacgcctctgttattatagtcctgtcggtttcgccacactctgacttgagc 2200  
gtcgatttttgtgatgctcgtcagggggcgagcctatggaaaaacgcagcaacgcggcctttttacggttctctggccttttgcgtggttttgcctca 2300  
catgttcttctcgttattccctgattctgtggataaccgtattaccgcctttgagtgagctgataccgctcgccgcagccgaacgacccgagcgcagc 2400  
gagtcagtgagcgaggaagcggaagagcgcccaatacgcaaacgcctctccccgcggttgcccgattcattaatgcagctggcagcacaggtttcccg 2500  
actggaaagcgggcagtgagcgcaacgcaattaatgtgagttagctcactcattaggcaccgccaggtttacactttatgcttccggctcgtatgttgtg 2600  
tggaaattgtgagcgataacaatttcacacaggaacagctatgaccatgattacgccaaagcttgcatgcctgcaggtcgactctagagatccccgggt 2700  
accgagctc 2709

## Appendix Figure S3 - DNA sequence used in this study.

The pUC119 plasmid containing the 20-nt target sequence (blue) and the NGG PAM (red) was linearized by *EcoRI* (green) and used as the target DNA. The longest off-target matching sequence to the sgRNA was 4-nt with a PAM sequence (grey highlight). Since Cas9 binding to such a short matching sequence is highly unstable (Singh *et al.*, 2016), we concluded that almost all Cas9 in the sgRNA/DNA-Cas9 ternary complex observed was bound to the target sequence in the DNA.
